# Supplementary material for: Mechanistic Insights into Melanin-Induced PCR Inhibition and Its NanoPCR-Based Mitigation
Source: Research Square preprint supplement (doi:10.21203/rs.3.rs-7137528/v1), 2025-07-30
Supplement: Supplementary file 1 [file 09ae380c91d777e14a48bb3d.docx]

**Mechanistic Insights into Melanin induced PCR Inhibition and Its NanoPCR-Based Mitigation**

Kamayani Vajpayeea, Shriyansh Srivastavab, Shivkant Sharmac, Swadha Guptad, Ashutosh Srivastavab, Vidhi Paidaa, Hirak Ranjan Dashe, Anju Pappachand, Ritesh K Shuklaa

**Supplementary File**

**Supplementary Figure S1: Crystal Structures of Taq Polymerase:**

**
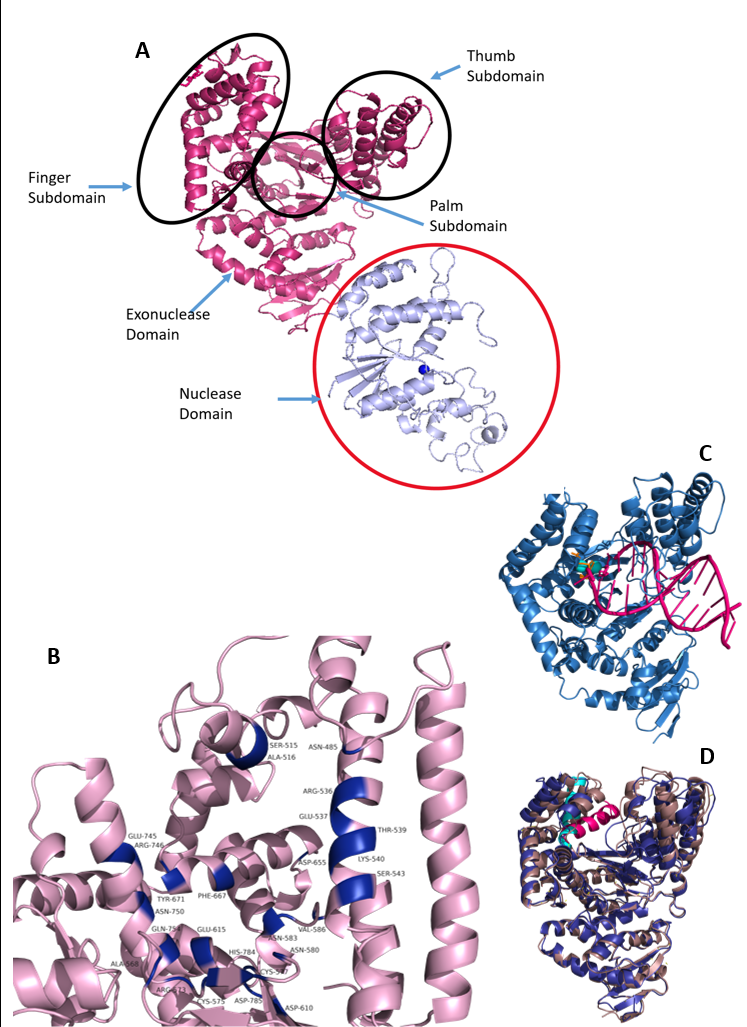
**

*Figure panel illustrating different Structural Conformations (Open and Closed) and Functional Insights of Taq Polymerase: (A) Open conformation of Taq Polymerase (PDB ID: 1TAQ) showing the Subdomains of Taq Polymerase Enzyme. There are two major domains-Polymerase (pink) and Nuclease Domain (purple). The polymerase domain comprises three subdomains_ Finger, Thumb, and Palm Subdomain, as encircled in black. The Zn²⁺ ion associated with its respective domain is shown in blue. (B) Active site residues of 1TAQ (shown in blue) that were used to define the molecular docking grid for further simulations. (C) Closed conformation of Taq Polymerase (PDB ID: 3KTQ), with the overall protein structure shown in blue. Two Mg²⁺ ions are depicted in cyan, the DNA-primer complex in pink, and dCTP in orange. (D) Structural alignment of 1TAQ (blue) with 3KTQ (brown) highlighting a major conformational transition from the open to closed state. The O helix, which undergoes a significant shift, is indicated in blue in its original position and pink in its closed conformation state.*

**Supplementary Figure S2: Structure of Melanin as retrieved from PubChem (ID: 6325610).**

**
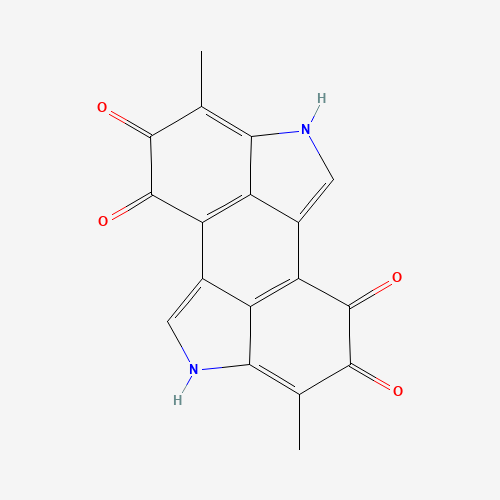
**

*Figure depicting the Chemical structure of Melanin*

**Supplementary Table S1: List of Active site residues used for grid generation:**

| **Residue** | **Position** | **Structural/Functional Correspondence** |
| --- | --- | --- |
| Asn485 | Palm | Stabilizes incoming dNTP |
| Ser515 | Palm | Part of catalytic core; interacts with primer terminus |
| Ala516 | Palm | Structural support near catalytic site |
| Arg536 | Fingers | Involved in nucleotide binding |
| Glu537 | Fingers | Stabilizes dNTP through ionic interactions |
| Thr539 | Fingers | Contributes to dNTP alignment |
| Lys540 | Fingers | dNTP coordination |
| Ser543 | Fingers | Structural stability; close to incoming nucleotide |
| Ala568 | Fingers | Structural role in dNTP channel |
| Arg573 | Fingers | Interacts with DNA backbone |
| Ser575 | Fingers | DNA interaction surface |
| Ser577 | Fingers | DNA backbone interaction |
| Asn580 | Fingers | Primer-template stabilization |
| Asn583 | Fingers | Stabilizes DNA duplex |
| Val586 | Fingers | Hydrophobic pocket near active site |
| Asp610 | Palm | Catalytic triad; coordinates Mg²⁺ |
| Glu615 | Palm | Catalytic triad; coordinates Mg²⁺ |
| Glu655 | Palm | Catalytic region; structural role |
| Phe667 | O-helix | Conformational switching; stabilizes closed complex |
| Tyr671 | O-helix | Key residue in helix repositioning during catalysis |
| Gln745 | Thumb | Binds duplex DNA |
| Arg746 | Thumb | DNA positioning and stabilization |
| Asn750 | Thumb | Structural support for DNA duplex |
| Gln754 | Thumb | DNA-binding interface |
| His784 | Thumb | DNA stabilization |
| Asp785 | Thumb | Structural support |
| Gln786 | Thumb | Maintains DNA trajectory |

*The table enlists the Active site residues that were used for grid generation. The catalytic residues are highlighted in yellow.*

**Supplementary Figure S3: Molecular Docking Analysis of the Taq Polymerase protein with the Melanin:**

1. **Docked Pose of Melanin with Open conformation of Protein (1TAQ)**

**
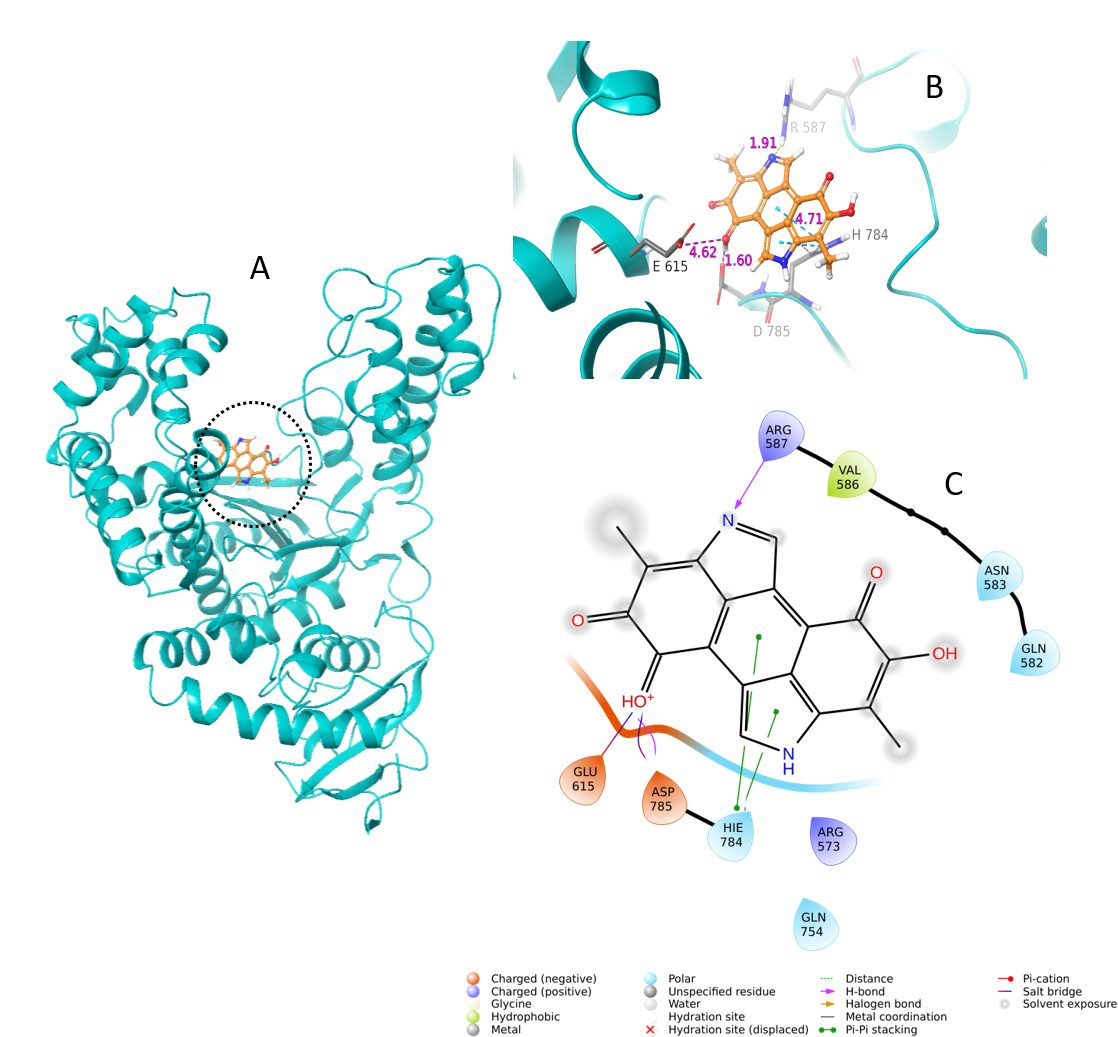
**

*Molecular docking analysis of the 1TAQ with Melanin illustrating (A) Overview of the Docked complex showing melanin bound within the active site of the Taq polymerase enzyme; (B) Close up view of the binding pocket depicting the key amino acid residues interacting with melanin. Hydrogen bonds and other interactions are labelled with corresponding bond lengths in Å; (C) 2D Ligand interaction diagram illustrating the melanin’s interactions with surrounding amino acid residues, including hydrogen bonds, hydrophobic bonds, and pi-pi interactions.*

1. **Docked Pose of Melanin with Closed conformation of Protein (3KTQ)**

**
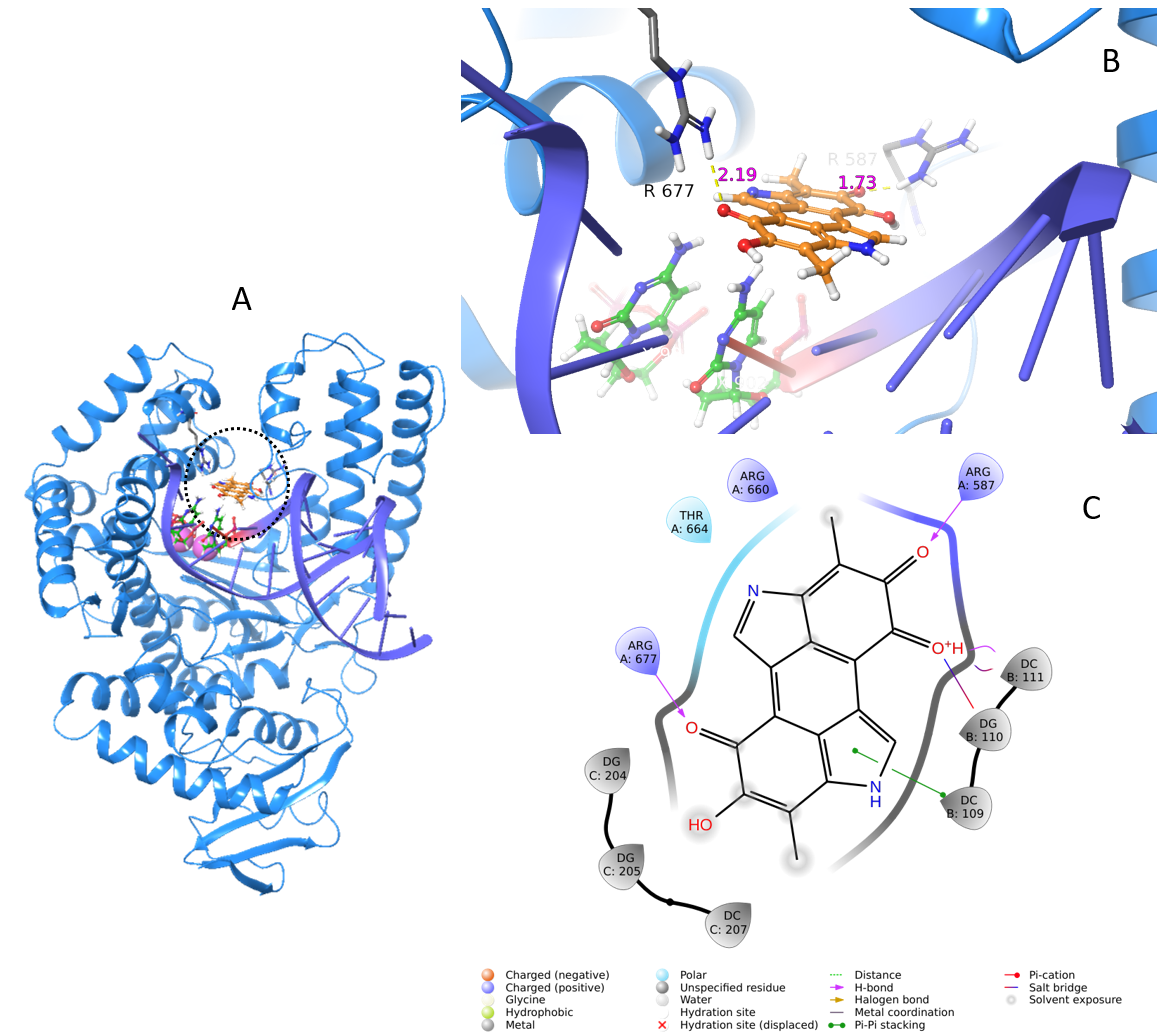
**

*Molecular docking analysis of the 3KTQ with Melanin illustrating (A) Overview of the Docked complex showing melanin bound within the active site of the Taq polymerase enzyme; (B) Close up view of the binding pocket depicting the key amino acid residues interacting with melanin. Hydrogen bonds and other interactions are labelled with corresponding bond lengths in Å; (C) 2D Ligand interaction diagram illustrating the melanin’s interactions with surrounding amino acid residues, including hydrogen bonds, hydrophobic bonds, and pi-pi interactions.*

1. **Docked pose of Melanin with Closed conformation of Enzyme having DNA-Primer moiety deleted.**

**
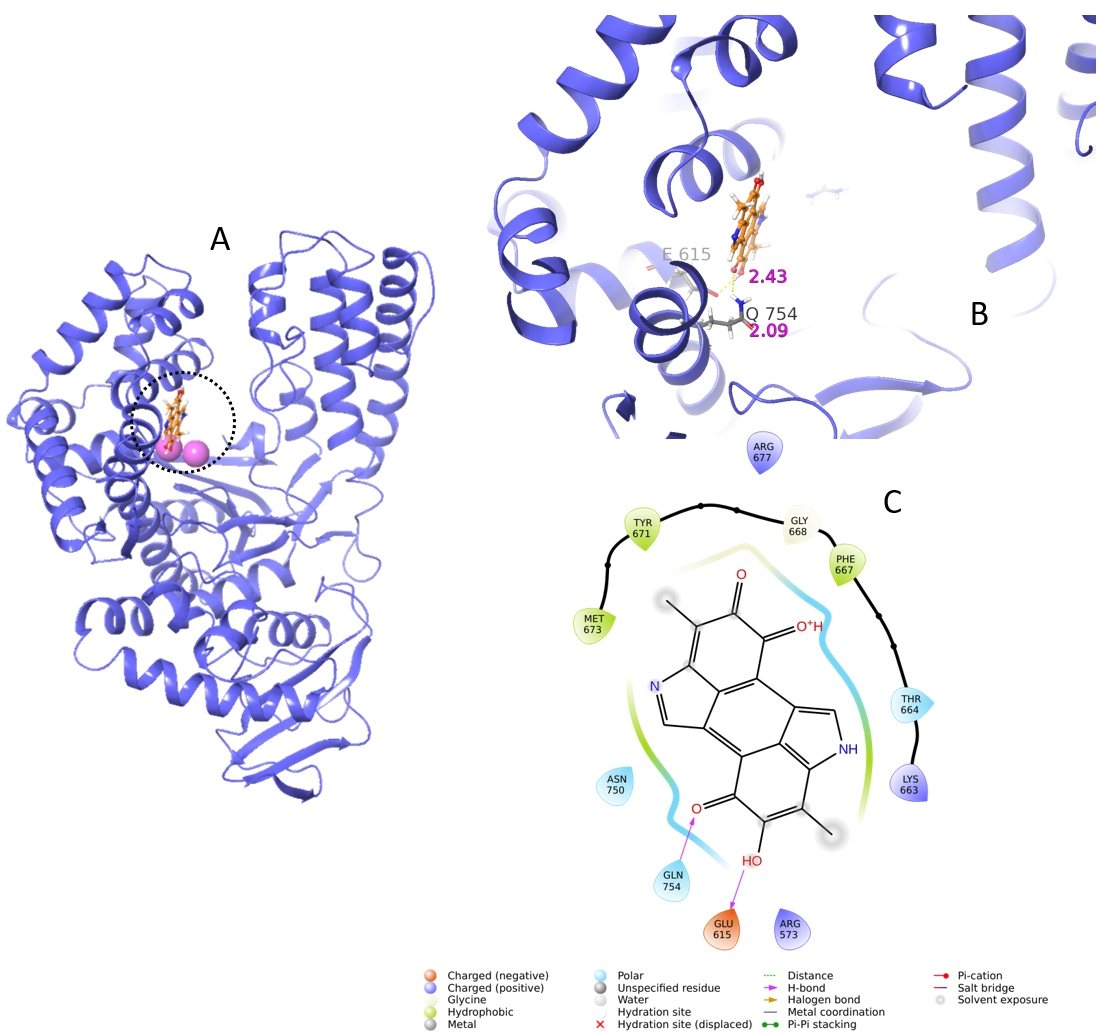
**

*Molecular docking analysis of the 3KTQ with DNA- Primer complex deleted (magnesium ion present) with Melanin illustrating (A) Overview of the Docked complex showing melanin bound within the active site of the Taq polymerase enzyme; (B) Close up view of the binding pocket depicting the key amino acid residues interacting with melanin. Hydrogen bonds and other interactions are labelled with corresponding bond lengths in Å; (C) 2D Ligand interaction diagram illustrating the melanin’s interactions with surrounding amino acid residues, including hydrogen bonds, hydrophobic bonds, and pi-pi interactions.*

1. **Docked pose of Melanin with Closed conformation of Enzyme having DNA-Primer and Mg2+ ions moiety deleted.**

**
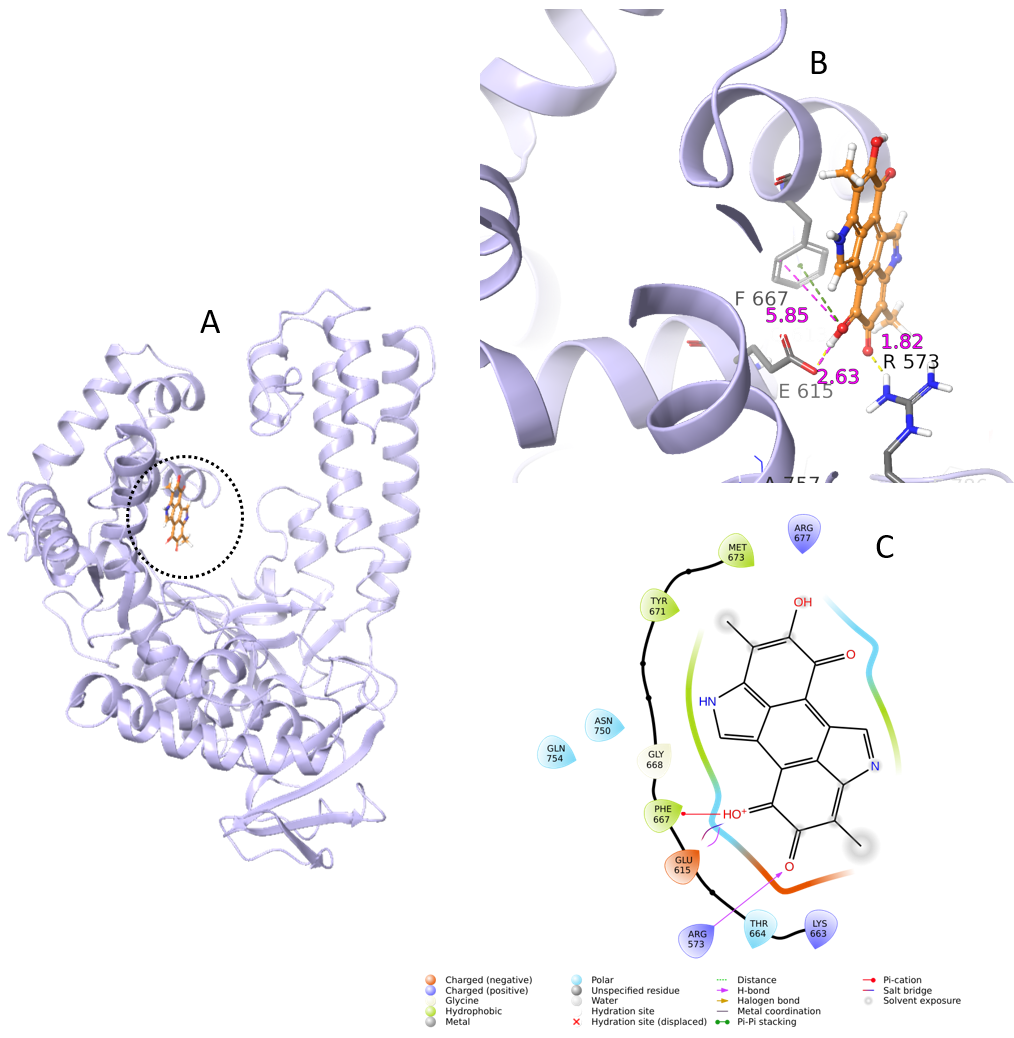
**

*Molecular docking analysis of the 3ktq with DNA-Primer complex and magnesium ion deleted with Melanin illustrating (A) Overview of the Docked complex showing melanin bound within the active site of the Taq polymerase enzyme; (B) Close up view of the binding pocket depicting the key amino acid residues interacting with melanin. Hydrogen bonds and other interactions are labelled with corresponding bond lengths in Å; (C) 2D Ligand interaction diagram illustrating the melanin’s interactions with surrounding amino acid residues, including hydrogen bonds, hydrophobic bonds, and pi-pi interactions.*

**Supplementary Table S2: A list of Taq Polymerase crystal structures available on Protein Data Bank.**

| **Identifier** | **Structure Data** | | | |
| --- | --- | --- | --- | --- |
| **Entity ID** | **DOI** | **PDB ID** | **Structure Title** | **Structure Keywords** |
| 1BGX_1 | 10.1073/pnas.95.21.12562 | 1BGX | TAQ POLYMERASE IN COMPLEX WITH TP7, AN INHIBITORY FAB | COMPLEX (POLYMERASE/INHIBITOR) |
| 1JXE_1 |  | 1JXE | STOFFEL FRAGMENT OF TAQ DNA POLYMERASE I | NUCLEOTIDYLTRANSFERASE |
| 1KTQ_1 | 10.1073/pnas.92.20.9264 | 1KTQ | DNA POLYMERASE | NUCLEOTIDYLTRANSFERASE |
| 1QSS_3 | 10.1073/pnas.96.17.9491 | 1QSS | DDGTP-TRAPPED CLOSED TERNARY COMPLEX OF THE LARGE FRAGMENT OF DNA POLYMERASE I FROM THERMUS AQUATICUS | Transferase/DNA |
| 1QSY_3 | 10.1073/pnas.96.17.9491 | 1QSY | DDATP-Trapped closed ternary complex of the large fragment of DNA Polymerase I from Thermus aquaticus | TRANSFERASE/DNA |
| 1QTM_3 | 10.1073/pnas.96.17.9491 | 1QTM | DDTTP-TRAPPED CLOSED TERNARY COMPLEX OF THE LARGE FRAGMENT OF DNA POLYMERASE I FROM THERMUS AQUATICUS | TRANSFERASE/DNA |
| 1TAQ_1 | 10.1038/376612a0 | 1TAQ | STRUCTURE OF TAQ DNA POLYMERASE | NUCLEOTIDYLTRANSFERASE |
| 1TAU_3 | 10.1038/382278a0 | 1TAU | TAQ POLYMERASE (E.C.2.7.7.7)/DNA/B-OCTYLGLUCOSIDE COMPLEX | transferase/DNA |
| 2KTQ_3 | 10.1093/emboj/17.24.7514 | 2KTQ | OPEN TERNARY COMPLEX OF THE LARGE FRAGMENT OF DNA POLYMERASE I FROM THERMUS AQUATICUS | TRANSFERASE/DNA |
| 3KTQ_3 | 10.1093/emboj/17.24.7514 | 3KTQ | CRYSTAL STRUCTURE OF AN ACTIVE TERNARY COMPLEX OF THE LARGE FRAGMENT OF DNA POLYMERASE I FROM THERMUS AQUATICUS | TRANSFERASE/DNA |
| 3LWL_1 | 10.1038/emboj.2010.64 | 3LWL | Structure of Klenow fragment of Taq polymerase in complex with an abasic site | TRANSFERASE/DNA |
| 3LWM_1 | 10.1038/emboj.2010.64 | 3LWM | Structure of the large fragment of thermus aquaticus DNA polymerase I in complex with a blunt-ended DNA and ddATP | TRANSFERASE/DNA |
| 3M8R_1 | 10.1002/anie.200905724 | 3M8R | Crystal structure of the large fragment of DNA polymerase I from Thermus aquaticus in a closed ternary complex with trapped 4'-ethylated dTTP | Transferase/DNA |
| 3M8S_1 | 10.1002/anie.200905724 | 3M8S | Crystal structure of the large fragment of DNA polymerase I from Thermus aquaticus in a closed ternary complex with trapped 4'-methylated dTTP | Transferase/DNA |
| 3OJS_1 | 10.1073/pnas.1013804107 | 3OJS | Snapshots of the large fragment of DNA polymerase I from Thermus Aquaticus processing C5 modified thymidines | Transferase/DNA |
| 3OJU_1 | 10.1073/pnas.1013804107 | 3OJU | Snapshot of the large fragment of DNA polymerase I from Thermus Aquaticus processing c5 modified thymidies | Transferase/DNA |
| 3PO4_1 | 10.1002/cbic.201000783 | 3PO4 | Structure of a mutant of the large fragment of DNA polymerase I from Thermus aquaticus in complex with a blunt-ended DNA and ddATP | TRANSFERASE/DNA |
| 3PO5_1 | 10.1002/cbic.201000783 | 3PO5 | Structure of a mutant of the large fragment of DNA polymerase I from Thermus Auqaticus in complex with an abasic site and ddATP | TRANSFERASE/DNA |
| 3PY8_1 | 10.1002/cbic.201000783 | 3PY8 | Crystal structure of a mutant of the large fragment of DNA polymerase I from thermus aquaticus in a closed ternary complex with DNA and ddCTP | Transferase/DNA |
| 3RR7_1 | 10.1074/jbc.M111.334904 | 3RR7 | Binary Structure of the large fragment of Taq DNA polymerase bound to an abasic site | TRANSFERASE/DNA |
| 3RR8_1 | 10.1074/jbc.M111.334904 | 3RR8 | Ternary Structure of the large fragment of Taq DNA polymerase bound to an abasic site and a ddGTP | TRANSFERASE/DNA |
| 3RRG_1 | 10.1074/jbc.M111.334904 | 3RRG | Ternary Structure of the large fragment of Taq DNA polymerase bound to an abasic site and a ddGTP | TRANSFERASE/DNA |
| 3RRH_1 | 10.1074/jbc.M111.334904 | 3RRH | Ternary Structure of the large fragment of Taq DNA polymerase bound to an abasic site and a ddTTP | TRANSFERASE/DNA |
| 3RTV_1 | 10.1038/nchembio.966 | 3RTV | Crystal structure of the large fragment of DNA polymerase I from Thermus Aquaticus in a closed ternary complex with natural primer/template DNA | TRANSFERASE/DNA |
| 3SV3_1 | 10.1038/nchembio.966 | 3SV3 | Crystal structure of the large fragment of DNA polymerase I from Thermus Aquaticus in a closed ternary complex with the artificial base pair dNaM-d5SICSTP | TRANSFERASE/DNA |
| 3SV4_1 | 10.1038/nchembio.966 | 3SV4 | Crystal structure of the large fragment of DNA polymerase I from Thermus Aquaticus in an open binary complex with dT as templating nucleobase | TRANSFERASE/DNA |
| 3SYZ_1 | 10.1038/nchembio.966 | 3SYZ | Crystal structure of the large fragment of DNA polymerase I from Thermus Aquaticus in an open binary complex with dNaM as templating nucleobase | TRANSFERASE/DNA |
| 3SZ2_1 | 10.1038/nchembio.966 | 3SZ2 | Crystal structure of the large fragment of DNA polymerase I from Thermus Aquaticus in an open binary complex with dG as templating nucleobase | TRANSFERASE/DNA |
| 3T3F_1 | 10.1074/jbc.M111.334904 | 3T3F | Ternary Structure of the large fragment of Taq DNA polymerase bound to an abasic site and dNTP | TRANSFERASE/DNA |
| 4BWJ_1 | 10.1002/anie.201306655 | 4BWJ | KlenTaq mutant in complex with DNA and ddCTP | TRANSFERASE/DNA |
| 4BWM_1 | 10.1002/anie.201306655 | 4BWM | KlenTaq mutant in complex with a RNA/DNA hybrid | TRANSFERASE/DNA/RNA |
| 4C8K_1 | 10.1021/ja409609j | 4C8K | Crystal structure of the large fragment of DNA polymerase I from Thermus Aquaticus in a partially closed complex with the artificial base pair d5SICS-dNaMTP | TRANSFERASE/DNA |
| 4C8L_1 | 10.1021/ja409609j | 4C8L | Binary complex of the large fragment of DNA polymerase I from Thermus Aquaticus with the artificial base pair dNaM-d5SICS at the postinsertion site (sequence context 1) | TRANSFERASE/DNA |
| 4C8M_1 | 10.1021/ja409609j | 4C8M | Binary complex of the large fragment of DNA polymerase I from Thermus Aquaticus with the artificial base pair d5SICS-dNaM at the postinsertion site (sequence context 2) | TRANSFERASE/DNA |
| 4C8N_1 | 10.1021/ja409609j | 4C8N | Binary complex of the large fragment of DNA polymerase I from Thermus Aquaticus with the artificial base pair dNaM-d5SICS at the postinsertion site (sequence context 3) | TRANSFERASE/DNA |
| 4C8O_1 | 10.1021/ja409609j | 4C8O | Binary complex of the large fragment of DNA polymerase I from Thermus Aquaticus with the aritificial base pair dNaM-d5SICS at the postinsertion site (sequence context 2) | TRANSFERASE/DNA |
| 4CCH_1 | 10.1021/ja409609j | 4CCH | Crystal structure of the large fragment of DNA polymerase I from Thermus Aquaticus in an open binary complex with d5SICS as templating nucleotide | TRANSFERASE/DNA |
| 4DF4_1 | 10.1021/ja3017889 | 4DF4 | Crystal structure of the large fragment of DNA Polymerase I from Thermus aquaticus in a closed ternary complex with 7-(N-(10-hydroxydecanoyl)-aminopentinyl)-7-deaza-2 -dATP | TRANSFERASE/DNA |
| 4DF8_1 | 10.1021/ja3017889 | 4DF8 | Crystal structure of the large fragment of DNA Polymerase I from Thermus aquaticus in a closed ternary complex with aminopentinyl-7-deaza-2-dATP | TRANSFERASE/DNA |
| 4DFJ_1 | 10.1021/ja3017889 | 4DFJ | Crystal structure of the large fragment of DNA Polymerase I from Thermus aquaticus in a closed ternary complex with 5-(aminopentinyl)-dTTP | TRANSFERASE/DNA |
| 4DFK_1 | 10.1021/ja3017889 | 4DFK | large fragment of DNA Polymerase I from Thermus aquaticus in a closed ternary complex with 5-(N-(10-hydroxydecanoyl)-aminopentinyl)-2-dUTP | TRANSFERASE/DNA |
| 4DFM_1 | 10.1021/ja3017889 | 4DFM | Crystal structure of the large fragment of DNA polymerase I from Thermus aquaticus in ternary complex with 5-(aminopentinyl)-2-dCTP | TRANSFERASE/DNA |
| 4DFP_1 | 10.1021/ja3017889 | 4DFP | Crystal structure of the large fragment of DNA Polymerase I from Thermus aqauticus in a ternary complex with 7-(aminopentinyl)-7-deaza-dGTP | TRANSFERASE/DNA |
| 4DLE_1 |  | 4DLE | Ternary Structure of the large Fragment of Taq DNA Polymerase: 4-Fluoroproline Variant | Transferase/DNA |
| 4DLG_1 |  | 4DLG | Ternary Structure of the large Fragment of Taq DNA polymerase | Transferase/DNA |
| 4ELT_1 | 10.1039/c2cc34181f | 4ELT | Snapshot of the large fragment of DNA polymerase I from Thermus Aquaticus processing modified pyrimidines | TRANSFERASE/DNA |
| 4ELU_1 | 10.1039/c2cc34181f | 4ELU | Snapshot of the large fragment of DNA polymerase I from Thermus Aquaticus processing modified pyrimidines | TRANSFERASE/DNA |
| 4ELV_1 |  | 4ELV | Snapshot of the large fragment of DNA polymerase I from Thermus Aquaticus processing modified pyrimidines | TRANSFERASE/DNA |
| 4KTQ_3 | 10.1093/emboj/17.24.7514 | 4KTQ | BINARY COMPLEX OF THE LARGE FRAGMENT OF DNA POLYMERASE I FROM T. AQUATICUS BOUND TO A PRIMER/TEMPLATE DNA | TRANSFERASE/DNA |
| 4N56_3 | 10.1021/bi501198f | 4N56 | Binary complex structure of Klenow fragment of Taq DNA polymerase I707L mutant (Cs3C KlenTaq) with DNA | TRANSFERASE/DNA |
| 4N5S_3 | 10.1021/bi501198f | 4N5S | Ternary complex structure of Klenow fragment of Taq DNA polymerase I707L mutant (Cs3C KlenTaq) with DNA and ddCTP | TRANSFERASE/DNA |
| 4XIU_3 | 10.1021/bi501198f | 4XIU | Binary complex structure of Klenow fragment of Taq DNA polymerase I707L mutant with DNA containing TTT overhang | TRANSFERASE/DNA |
| 5E41_1 | 10.1002/chem.201604515 | 5E41 | Crystal structure of the large fragment of DNA Polymerase I from Thermus aquaticus in a closed ternary complex with 5-(N-(10-hydroxydecanoyl)-aminopentenyl)-2'-deoxyuridine-triphosphate | TRANSFERASE |
| 5KTQ_1 | 10.1002/pro.5560070505 | 5KTQ | LARGE FRAGMENT OF TAQ DNA POLYMERASE BOUND TO DCTP | TRANSFERASE |
| 5NKL_1 | 10.1002/anie.201704190 | 5NKL | Crystal structure of the large fragment of DNA polymerase I from Thermus Aquaticus in a closed ternary complex with the artificial base pair dDs-dPxTP | TRANSFERASE |
| 5O7T_1 | 10.1039/c7cc07173f | 5O7T | Crystal structure of KlenTaq mutant M747K in a closed ternary complex with a dG:dCTP base pair | TRANSFERASE |
| 5OXJ_1 | 10.1039/c7cc07173f | 5OXJ | Crystal structure of KlenTaq mutant M747K in a closed ternary complex with a O6-MeG:BenziTP base pair | TRANSFERASE |
| 5SZT_1 | 10.1002/chem.201604515 | 5SZT | Crystal structure of the large fragment of DNA Polymerase I from Thermus aquaticus in a closed ternary complex with 7-(N-(10-hydroxydecanoyl)-aminopentenyl)-7-deaza-2'-dATP | TRANSFERASE |
| 5W6K_1 | 10.1093/nar/gky552 | 5W6K | Structure of mutant Taq Polymerase incorporating unnatural base pairs Z:P | DNA binding protein/DNA |
| 5W6Q_1 | 10.1093/nar/gky552 | 5W6Q | Structural basis for recognition of artificial DNA by an evolved KlenTaq variant | DNA BINDING PROTEIN/DNA |
| 5YTC_1 | 10.1002/anie.201807845 | 5YTC | Large fragment of DNA Polymerase I from Thermus aquaticus in a closed ternary complex with the unnatural base M-fC pair with dATP in the active site | TRANSFERASE/DNA |
| 5YTD_1 | 10.1002/anie.201807845 | 5YTD | large fragment of DNA Polymerase I from Thermus aquaticus in a closed ternary complex with the natural base pair 5fC:dGTP | REPLICATION/DNA |
| 5YTE_1 | 10.1002/anie.201807845 | 5YTE | Large fragment of DNA Polymerase I from Thermus aquaticus in a closed ternary complex with with natural dT:dATP base pair | REPLICATION/DNA |
| 5YTF_1 | 10.1002/anie.201807845 | 5YTF | Structure of large fragment of DNA Polymerase I from Thermus aquaticus Host-Guest complex with the unnatural base M-fC pair with dA | TRANSFERASE/DNA |
| 5YTG_1 | 10.1002/anie.201807845 | 5YTG | Structure of large fragment of DNA Polymerase I from Thermus aquaticus Host-Guest complex with the unnatural base I-fC pair with dA | TRANSFERASE/DNA |
| 5YTH_1 | 10.1002/anie.201807845 | 5YTH | Structure of large fragment of DNA Polymerase I from Thermus aquaticus Host-Guest complex with the unnatural base M-fC pair with dG | TRANSFERASE/DNA |
| 5Z3N_1 | 10.1002/anie.201807845 | 5Z3N | Structure of large fragment of DNA Polymerase I from Thermus aquaticus Host-Guest complex with the unnatural base 5fC pair with dA | REPLICATION/DNA |
| 6FBC_1 | 10.1073/pnas.1811518115 | 6FBC | KlenTaq DNA polymerase processing a modified primer - bearing the modification at the 3'-terminus of the primer. | DNA BINDING PROTEIN |
| 6FBD_1 | 10.1073/pnas.1811518115 | 6FBD | KlenTaq DNA polymerase processing a modified primer - bearing the modification upstream at the second primer nucleotide. | DNA BINDING PROTEIN |
| 6FBE_1 | 10.1073/pnas.1811518115 | 6FBE | KlenTaq DNA polymerase processing a modified primer - bearing the modification upstream at the third primer nucleotide. | DNA BINDING PROTEIN |
| 6FBF_1 | 10.1073/pnas.1811518115 | 6FBF | KlenTaq DNA polymerase processing a modified primer - bearing the modification upstream at the fourth primer nucleotide. | DNA BINDING PROTEIN |
| 6FBG_1 | 10.1073/pnas.1811518115 | 6FBG | KlenTaq DNA polymerase processing a modified primer - bearing the modification upstream at the fifth primer nucleotide. | DNA BINDING PROTEIN |
| 6FBH_1 | 10.1073/pnas.1811518115 | 6FBH | KlenTaq DNA polymerase processing a modified primer - bearing the modification upstream at the sixth primer nucleotide. | DNA BINDING PROTEIN |
| 6FBI_1 | 10.1073/pnas.1811518115 | 6FBI | KlenTaq DNA polymerase in a closed, ternary complex with dGpNHpp bound in the active site | DNA BINDING PROTEIN |
| 6Q4U_1 | 10.1002/anie.201900315 | 6Q4U | KlenTaq DNA pol in a closed ternary complex with 7-deaza-7-(2-(2-hydroxyethoxy)-N-(prop-2-yn-1-yl)acetamide)-2-dATP | DNA BINDING PROTEIN |
| 6Q4V_1 | 10.1002/anie.201900315 | 6Q4V | KlenTaq DNA polymerase in complex with dATP | DNA BINDING PROTEIN |
| 7OWF_1 | 10.1021/jacs.2c03454 | 7OWF | KlenTaq DNA polymerase in a ternary complex with primer/template and the fluorescent nucleotide analogue BFdUTP | TRANSFERASE |
| 8XK7_1 | 10.1016/j.jmb.2024.168744 | 8XK7 | binary complex of DNA polymerase SFM4-3 recognising C2 methyoxy nucleotide | DNA BINDING PROTEIN |

**Supplementary Table S3: Statistical Analysis:**

1. **TPH (Control, inhibitor treated, AuNPs, and AuBSA treated)**

| Friedman test |  |
| --- | --- |
| P value | <0.0001 |
| Exact or approximate P value? | Approximate |
| P value summary | **** |
| Are means signif. different? (P < 0.05) | Yes |
| Number of groups | 4 |
| Friedman statistic | 51.51 |
|  |  |
| Data summary |  |
| Number of treatments (columns) | 4 |
| Number of subjects (rows) | 28 |

- **Dunn’s Multiple Comparison:**

| Number of families | 1 |
| --- | --- |
| Number of comparisons per family | 3 |
| Alpha | 0.05 |

| Dunn's multiple comparisons test | Rank sum diff. | Significant? | Summary | Adjusted P Value |
| --- | --- | --- | --- | --- |
| Control vs. Inhibited | -6.000 | No | ns | >0.9999 |
| Control vs. AuNPs | -32.00 | Yes | ** | 0.0028 |
| Control vs. Au:BSA | -62.00 | Yes | **** | <0.0001 |

| Test details | Rank sum 1 | Rank sum 2 | Rank sum diff. | n1 | n2 |
| --- | --- | --- | --- | --- | --- |
| Control vs. Inhibited | 45.00 | 51.00 | -6.000 | 28 | 28 |
| Control vs. AuNPs | 45.00 | 77.00 | -32.00 | 28 | 28 |
| Control vs. Au:BSA | 45.00 | 107.0 | -62.00 | 28 | 28 |

1. **TPH (Inhibitor treated, AuNPs, and AuBSA treated)**

| Table Analyzed | TPH_INHIBITOR |
| --- | --- |
|  |  |
| Friedman test |  |
| P value | <0.0001 |
| Exact or approximate P value? | Approximate |
| P value summary | **** |
| Are means signif. different? (P < 0.05) | Yes |
| Number of groups | 3 |
| Friedman statistic | 38.64 |
|  |  |
| Data summary |  |
| Number of treatments (columns) | 3 |
|  |  |
| Number of subjects (rows) | 28 |

- **Dunn’s Multiple Comparison:**

| Number of families | 1 |
| --- | --- |
| Number of comparisons per family | 2 |
| Alpha | 0.05 |

| Dunn's multiple comparisons test | Rank sum diff. | Significant? | Summary | Adjusted P Value |
| --- | --- | --- | --- | --- |
| Inhibited vs. AuNPs | -17.00 | Yes | * | 0.0462 |
| Inhibited vs. Au:BSA | -46.00 | Yes | **** | <0.0001 |

| Test details | Rank sum 1 | Rank sum 2 | Rank sum diff. | n1 | n2 |
| --- | --- | --- | --- | --- | --- |
| Inhibited vs. AuNPs | 35.00 | 52.00 | -17.00 | 28 | 28 |
| Inhibited vs. Au:BSA | 35.00 | 81.00 | -46.00 | 28 | 28 |

1. **PHR (Control, inhibitor treated, AuNPs, and AuBSA treated)**

| Table Analyzed | PHR_CONTROL |
| --- | --- |
|  |  |
| Friedman test |  |
| P value | 0.2888 |
| Exact or approximate P value? | Approximate |
| P value summary | ns |
| Are means signif. different? (P < 0.05) | No |
| Number of groups | 4 |
| Friedman statistic | 3.758 |
|  |  |
| Data summary |  |
| Number of treatments (columns) | 4 |
| Number of subjects (rows) | 18 |

- **Dunn’s Multiple Comparison:**

| Number of families | 1 |
| --- | --- |
| Number of comparisons per family | 3 |
| Alpha | 0.05 |

| Dunn's multiple comparisons test | | Rank sum diff. | | --- | |  | |  | |  | | Significant? | Summary | Adjusted P Value |
| --- | --- | --- | --- | --- | --- | --- | --- | --- |
| Control vs. Inhibited | -0.5000 | No | ns | >0.9999 |
| Control vs. AuNPs | -13.00 | No | ns | 0.2799 |
| Control vs. Au:BSA | -6.500 | No | ns | >0.9999 |

1. **PHR (Inhibitor treated, AuNPs, and AuBSA treated)**

| Table Analyzed | PHR_INHIBITOR | |
| --- | --- | --- |
|  |  |
| Friedman test |  |
| P value | 0.4111 |
| Exact or approximate P value? | Approximate |
| P value summary | ns |
| Are means signif. different? (P < 0.05) | No |
| Number of groups | 3 |
| Friedman statistic | 1.778 |
|  |  |
| Data summary |  |
| Number of treatments (columns) | 3 |
| Number of subjects (rows) | 18 |

- **Dunn’s Multiple Comparison:**

| Number of families | 1 |
| --- | --- |
| Number of comparisons per family | 2 |
| Alpha | 0.05 |

| Dunn's multiple comparisons test | Rank sum diff. | Significant? | Summary | Adjusted P Value |
| --- | --- | --- | --- | --- |
| Inhibited vs. AuNPs | -8.000 | No | ns | 0.3648 |
| Inhibited vs. Au:BSA | -4.000 | No | ns | >0.9999 |

| Test details | Rank sum 1 | Rank sum 2 | Rank sum diff. | n1 | n2 |
| --- | --- | --- | --- | --- | --- |
| Inhibited vs. AuNPs | 32.00 | 40.00 | -8.000 | 18 | 18 |
| Inhibited vs. Au:BSA | 32.00 | 36.00 | -4.000 | 18 | 18 |

1. **Global Parameter (Control, inhibitor treated, AuNPs, and AuBSA treated)**

| Table Analyzed | Dye Channel_Control |
| --- | --- |
|  |  |
| Friedman test |  |
| P value | 0.0018 |
| Exact or approximate P value? | Exact |
| P value summary | ** |
| Are means signif. different? (P < 0.05) | Yes |
| Number of groups | 4 |
| Friedman statistic | 11.64 |
|  |  |
| Data summary |  |
| Number of treatments (columns) | 4 |
| Number of subjects (rows) | 5 |

- **Dunn’s Multiple Comparison:**

| Number of families | 1 |
| --- | --- |
| Number of comparisons per family | 3 |
| Alpha | 0.05 |

| Dunn's multiple comparisons test | Rank sum diff. | Significant? | Summary | Adjusted P Value |
| --- | --- | --- | --- | --- |
| Control vs. Inhibited | -4.000 | No | ns | 0.9816 |
| Control vs. AuNPs | -9.000 | No | ns | 0.0825 |
| Control vs. Au:BSA | -13.00 | Yes | ** | 0.0044 |

| Test details | Rank sum 1 | Rank sum 2 | Rank sum diff. | n1 | n2 |
| --- | --- | --- | --- | --- | --- |
| Control vs. Inhibited | 6.000 | 10.00 | -4.000 | 5 | 5 |
| Control vs. AuNPs | 6.000 | 15.00 | -9.000 | 5 | 5 |
| Control vs. Au:BSA | 6.000 | 19.00 | -13.00 | 5 | 5 |

1. **Global Parameter (Inhibitor treated, AuNPs, and AuBSA treated)**

| Table Analyzed | Dye Channel_Inhibitor |
| --- | --- |
|  |  |
| Friedman test |  |
| P value | 0.0394 |
| Exact or approximate P value? | Exact |
| P value summary | * |
| Are means signif. different? (P < 0.05) | Yes |
| Number of groups | 3 |
| Friedman statistic | 6.400 |
|  |  |
| Data summary |  |
| Number of treatments (columns) | 3 |
| Number of subjects (rows) | 5 |

- **Dunn’s Multiple Comparison:**

| Number of families | 1 |
| --- | --- |
| Number of comparisons per family | 2 |
| Alpha | 0.05 |

| Dunn's multiple comparisons test | Rank sum diff. | Significant? | Summary | Adjusted P Value |
| --- | --- | --- | --- | --- |
| Inhibited vs. AuNPs | -4.000 | No | ns | 0.4118 |
| Inhibited vs. Au:BSA | -8.000 | Yes | * | 0.0228 |

| Test details | Rank sum 1 | Rank sum 2 | Rank sum diff. | n1 | n2 |
| --- | --- | --- | --- | --- | --- |
| Inhibited vs. AuNPs | 6.000 | 10.00 | -4.000 | 5 | 5 |
| Inhibited vs. Au:BSA | 6.000 | 14.00 | -8.000 | 5 | 5 |
